# Supplementary material for: Effects of the elements in SchoolHealth on adolescents’ health literacy, general self-efficacy and health-related quality of life—A randomized factorial trial
Source: Research Square preprint supplement (doi:10.21203/rs.3.rs-8174141/v1), 2025-12-23
Supplement: Supplementary file 2 [file e6b1e936abdf464cc9aa7435.docx]

Appendix Table 1 Main and interaction effects for Health literacy, General Self- Efficacy and
Kidscreen subscales stratified by gender

| Girls | | | | |  | Boys | | | | |  |
| --- | --- | --- | --- | --- | --- | --- | --- | --- | --- | --- | --- |
| T3 | | | | | | | | | | | |
| Health Literacy | | | | | | | | | | | |
| Factor | effect | lower | upper | pa |  | Element | Estimate | Lower | Upper | *Pa* | *Pb* |
| DFA | 1.26 | -2.24 | 4.76 | .470 |  | DFA | -0.22 | -4.28 | 3.84 | .913 | .519 |
| DS | 1.60 | -1.90 | 5.09 | .362 | DS | -0.18 | -4.24 | 3.88 | .930 | .581 |
| CM | 0.48 | -3.02 | 3.98 | .783 | CM | 0.75 | -3.30 | 4.81 | .709 | .366 |
| DFA by DS | -0.16 | -3.66 | 3.33 | .925 | DFA by DS | -2.94 | -7.00 | 1.11 | .150 | .813 |
| DFA by CM | -3.16 | -6.66 | 0.33 | .075 | DFA by CM | 1.06 | -3.00 | 5.12 | .600 | .248 |
| DS by CM | -1.11 | -4.61 | 2.39 | .524 | DS by CM | 1.93 | -2.13 | 5.98 | .343 | .046** |
| DFA by DS by CM | -0.95 | -4.44 | 2.55 | .587 | DFA by DS by CM | -1.52 | -5.58 | 2.54 | .454 | .194 |
| General Self-efficacy1 | | | | | | | | | | |  |
| Factor | effect | lower | upper | pa |  | Element | Estimate | Lower | Upper | *Pa* | *Pb* |
| DFA | 0.48 | -2.14 | 3.09 | .720 | DFA | -0.21 | -3.43 | 3.00 | .894 | .652 |
| DS | 1.83 | -0.78 | 4.45 | .170 | DS | 1.34 | -1.88 | 4.55 | .405 | .794 |
| CM | 1.52 | -1.09 | 4.14 | .253 | CM | 1.73 | -1.49 | 4.94 | .284 | .996 |
| DFA by DS | 1.72 | -0.90 | 4.33 | .198 | DFA by DS | -1.86 | -5.08 | 1.35 | .249 | .069 |
| DFA by CM | -0.89 | -3.50 | 1.73 | .507 | DFA by CM | 2.54 | -0.68 | 5.75 | .118 | .092 |
| DS by CM | 0.79 | -1.82 | 3.41 | .551 | DS by CM | -0.57 | -3.79 | 2.64 | .721 | .467 |
| DFA by DS by CM | -3.33 | -5.94 | -0.72 | .013** | DFA by DS by CM | -2.13 | -5.34 | 1.09 | .189 | .563 |
| Physical Well-Being | | | | | | | | | | |  |
| Factor | effect | lower | upper | pa |  | Element | Estimate | Lower | Upper | *Pa* | *Pb* |
| DFA | -0.95 | -2.83 | 0.93 | .314 | DFA | 1.41 | -0.81 | 3.63 | .206 | .027** |
| DS | 0.46 | -1.43 | 2.34 | .627 | DS | 1.51 | -0.70 | 3.73 | .175 | .360 |
| CM | 0.53 | -1.36 | 2.41 | .576 | CM | 1.31 | -0.90 | 3.53 | .238 | .526 |
| DFA by DS | 0.93 | -0.96 | 2.81 | .326 | DFA by DS | -1.29 | -3.51 | 0.93 | .246 | .067 |
| DFA by CM | -1.36 | -3.24 | 0.52 | .151 | DFA by CM | -1.05 | -3.27 | 1.16 | .342 | .705 |
| DS by CM | 0.35 | -1.53 | 2.23 | .711 | DS by CM | 0.362 | -1.85 | 2.58 | .743 | .947 |
| DFA by DS by CM | 0.01 | -1.87 | 1.90 | .989 | DFA by DS by CM | -0.01 | -2.23 | 2.21 | .994 | .806 |
| Psychological Well-being | | | | | | | | | | |  |
| Factor | effect | lower | upper | pa |  | Element | Estimate | Lower | Upper | *Pa* | *Pb* |
| DFA | 0.27 | -0.72 | 1.26 | .582 | DFA | 0.47 | -0.74 | 1.67 | .431 | .947 |
| DS | 0.65 | -0.34 | 1.64 | .190 | DS | 0.76 | -0.44 | 1.96 | .206 | .647 |
| CM | 1.23 | 0.24 | 2.22 | .017** | CM | 0.19 | -1.01 | 1.39 | .746 | .166 |
| DFA by DS | -0.12 | -1.10 | 0.88 | .813 | DFA by DS | -0.61 | -1.81 | 0.59 | .306 | .367 |
| DFA by CM | -1.78 | -2.78 | -0.80 | .001** | DFA by CM | 0.78 | -0.42 | 1.99 | .192 | .000** |
| DS by CM | -0.72 | -1.71 | 0.27 | .147 | DS by CM | -0.68 | -1.88 | 0.52 | .255 | .883 |
| DFA by DS by CM | -0.32 | -1.31 | 0.67 | .509 | DFA by DS by CM | 0.18 | -1.03 | 1.38 | .766 | .141 |
| Autonomy and Parent Relation1 | | | | | | | | | | |  |
| Factor | Estimate | Lower | Upper | *Pa* |  | Element | Estimate | Lower | Upper | *Pa* | *Pb* |
| DFA | -0.22 | -1.72 | 1.28 | .772 | DFA | 0.20 | -1.49 | 1.90 | .809 | .707 |
| DS | 0.58 | -0.92 | 2.08 | .449 | DS | 1.67 | -0.02 | 3.37 | .053 | .335 |
| CM | 2.01 | 0.512 | 3.51 | .009** | CM | 1.53 | -0.16 | 3.23 | .075 | .674 |
| DFA by DS | 0.13 | -1.37 | 1.63 | .862 | DFA by DS | 0.16 | -1.54 | 1.85 | .852 | .983 |
| DFA by CM | -0.33 | -1.83 | 1.17 | .664 | DFA by CM | 1.74 | 0.04 | 3.43 | .045** | .068 |
| DS by CM | -1.07 | -2.57 | 0.43 | .161 | DS by CM | -0.36 | -2.06 | 1.33 | .667 | .532 |
| DFA by DS by CM | -0.42 | 1.92 | 1.08 | .582 | DFA by DS by CM | 1.15 | -0.54 | 2.85 | .178 | .166 |
| Peer and Social Support1 | | | | | | | | | | |  |
| Factor | effect | lower | upper | pa |  | Factor | Estimate | Lower | Upper | *Pa* | *Pb* |
| DFA | 0.28 | -1.35 | 1.91 | .734 | DFA | 0.86 | -1.25 | 2.97 | .416 | .701 |
| DS | -0.68 | -2.31 | 0.95 | .412 | DS | 1.85 | -0.26 | 3.96 | .084 | .081 |
| CM | 1.58 | -0.05 | 3.21 | .057 | CM | 0.69 | -1.42 | 2.79 | .515 | .354 |
| DFA by DS | 1.15 | -0.48 | 2.79 | .165 | DFA by DS | 0.49 | -1.61 | 2.60 | .638 | .602 |
| DFA by CM | 1.19 | -0.44 | 2.82 | .154 | DFA by CM | 1.34 | -0.77 | 3.44 | .207 | .944 |
| DS by CM | -0.88 | -2.51 | 0.75 | .292 | DS by CM | -0.64 | -2.74 | 1.47 | .546 | .930 |
| DFA by DS by CM | -0.97 | -2.60 | 0.66 | .243 | DFA by DS by CM | 1.72 | -0.39 | 3.82 | .108 | .012** |
| School Environment | | | | | | | | | | |  |
| Factor | effect | lower | upper | pa |  | Factor | Estimate | Lower | Upper | *Pa* | *Pb* |
| DFA | 1.61 | -0.50 | 3.72 | .131 | DFA | 0.42 | -2.28 | 3.1 | .755 | .253 |
| DS | 0.73 | -1.38 | 2.83 | .490 | DS | 1.333 | -1.38 | 4.03 | .327 | .815 |
| CM | 0.65 | -1.46 | 2.76 | .538 | CM | 1.00 | -1.70 | 3.71 | .458 | .783 |
| DFA by DS | 0.29 | -1.82 | 2.40 | .782 | DFA by DS | 0.51 | -2.19 | 3.21 | .705 | .985 |
| DFA by CM | -1.78 | -3.89 | 0.33 | .096 | DFA by CM | 1.27 | -1.43 | 3.98 | .346 | .012** |
| DS by CM | -1.68 | -3.78 | 0.43 | .116 | DS by CM | 0.12 | -2.58 | 2.83 | .927 | .194 |
| DFA by DS by CM | -0.60 | -2.71 | 1.51 | .568 | DFA by DS by CM | 0.44 | -3.14 | 2.26 | .744 | .906 |

*DFA=Digital Feedback and Administration tool, DS=Dialog Support, CM= Corporation Materials.
1Unstable models due to the inability to calculate confidence intervals at the school level for girls.
Replaced by linear regression, with the school level removed. 
**Statistically significant value* pa: *p-value for effect, Pb:p--value for interaction with gender*
