# Supplementary figures and images for: Effects of the elements in SchoolHealth on adolescents’ health literacy, general self-efficacy and health-related quality of life—A randomized factorial trial
Source: Research Square preprint supplement (doi:10.21203/rs.3.rs-8174141/v1), 2025-12-23

R-script for randomisation with example schools to show how it was done


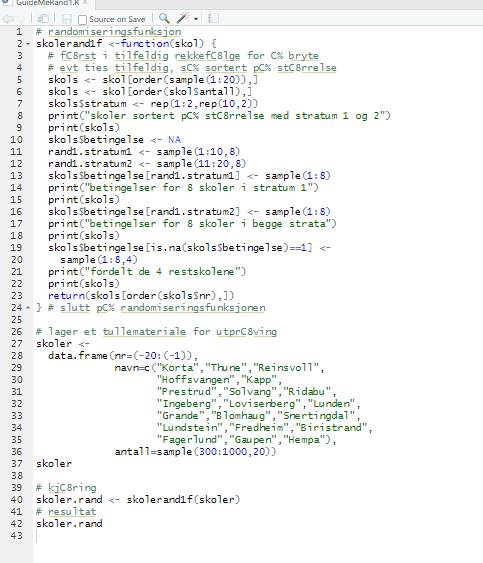

Supplement: Supplementary file 1 [file 895ec5422edf43148482426a.docx]
